# Supplementary material for: A facile fluorescent sensor based on nitrogen-doped carbon dots derived from Listeria monocytogenes for highly selective and visual detection of iodide and pH
Source: Royal Society of Chemistry journal article supplement (doi:10.1039/d2ra00826b), 2022-01-01
Supplement: d2ra00826b1.pdf [file d2ra00826b1.pdf]

## Supplementary Material

### **A facile fluorescent sensor based on nitrogen-doped carbon dots derived from *Listeria monocytogenes* for highly selective and visual detection of iodide and pH**

Mingsha Jie,<sup>ab</sup> Ruipeng Guo,<sup>c</sup> Yanan Zhang,<sup>a</sup> Jianing Huang,<sup>a</sup> Gaigai Xu,<sup>a</sup> Min Li,<sup>ab</sup>

Xiaoyue Yue,<sup>ab</sup> Baocheng Ji<sup>ab</sup> and Yanhong Bai\*<sup>ab</sup>

<sup>a</sup> College of Food and Bioengineering, Zhengzhou University of Light Industry,  
Zhengzhou, Henan Province, 450001, P. R. China

<sup>b</sup> Henan Key Laboratory of Cold Chain Food Quality and Safety Control,  
Zhengzhou, Henan Province, 450001, P. R. China

<sup>c</sup> School of Mechanical and Electrical Engineering, Henan Vocational College  
of Applied Technology, Zhengzhou, Henan Province, 450042, P. R. China

**\*Corresponding author:**

Tel: +86-28-82890810. Fax: 86-28-82890825. E-mail: baiyanhong212@163.com (Y.H. Bai)

### **pH reversibility test**

The pH reversibility test referred to the previous literatures<sup>1-3</sup>, and the method in detail is as follows:

The pH of NCDs-LM solution between pH 5 and pH 9 was adjusted back and forth by 2 M HCl or NaOH, and then measured by pH meter. The fluorescence spectra were recorded with  $\lambda_{ex} = 490$  nm.

### **The captions of figures and tables**

**Fig. S1** (a) The fluorescence emission spectra of the NCDs-LM, NCDs-LM-Hg<sup>2+</sup> and NCDs-LM-Hg<sup>2+</sup>-I<sup>-</sup> mixture in aqueous solution. (b) The fluorescence stability of the NCDs-LM, NCDs-LM-Hg<sup>2+</sup> and NCDs-LM-Hg<sup>2+</sup>-I<sup>-</sup> solutions.

**Fig. S2** (a) UV-vis absorption spectra of NCDs-LM (100  $\mu\text{g}/\text{mL}$ ), NCDs-LM-Hg<sup>2+</sup> and NCDs-LM-Hg<sup>2+</sup>-I<sup>-</sup> mixture in aqueous solution. (b) Fluorescence decay curves of NCDs-LM (100  $\mu\text{g}/\text{mL}$ ), NCDs-LM-Hg<sup>2+</sup> and NCDs-LM-Hg<sup>2+</sup>-I<sup>-</sup> mixture ( $\lambda_{ex}=490$  nm,  $\lambda_{em}=550$  nm).

**Table S1** Comparison of the LOD with the reported methods of I<sup>-</sup> determination.

**Table S2** The fluorescence lifetimes of NCDs-LM ( $\lambda_{ex} =490$  nm,  $\lambda_{em} =550$  nm) at different pH.

**Table S3** Comparison of the pH range with the reported methods of pH determination.

**Fig.S1.**

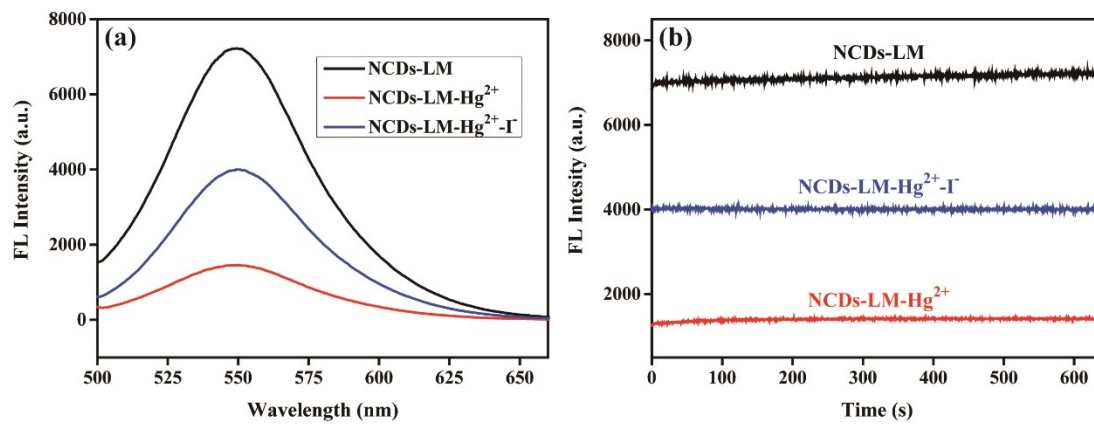

**Fig.S2.**

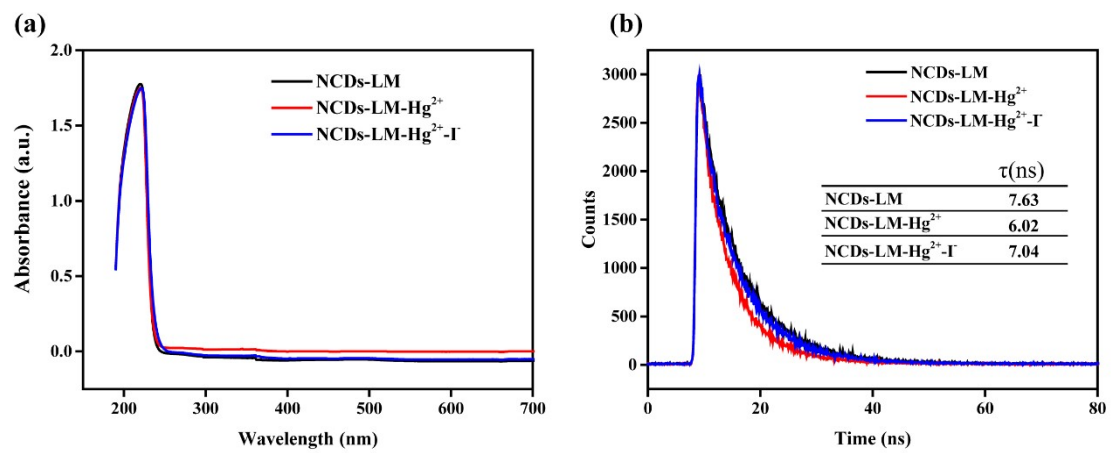

**Table S1** Comparison of the LOD with the reported methods of I<sup>-</sup> determination.

| Detection methods                        | Strategy/Materials                                                          | Linear range                            | LOD                    | Reference |
|------------------------------------------|-----------------------------------------------------------------------------|-----------------------------------------|------------------------|-----------|
| HPLC-DAD                                 | Phosphatidylcholine column                                                  | 0.5-10.0 mg /L                          | 22.84 ng/mL            | 4         |
| HPLC-MS/MS                               | Ultrasonic extraction followed by HPLC-ESI-MS/MS                            | 0.5- 200 ng/mL                          | 0.15 ng/mL             | 5         |
| Cathodic stripping voltammetry           | Chitosan coating screen-printed carbon electrode                            | 0.15-500 $\mu$ mol/L                    | 10 nmol/L              | 6         |
| Capillary electrophoresis                | UV detection                                                                | 0.20-4.0 $\mu$ mol/L                    | 60 nmol/L              | 7         |
| Chemiluminescence                        | KMnO <sub>4</sub> -carbon dots                                              | 3.0-100 $\mu$ mol/L                     | 350 nmol/L             | 8         |
| Fluorescence                             | Carbon dots                                                                 | 0.5-20 $\mu$ mol/L                      | 430 nmol/L             | 9         |
| Fluorescence                             | Nitrogen-doped carbon dots                                                  | 0.3-15 $\mu$ mol/L                      | 69.4 nmol/L            | 10        |
| Fluorescence                             | Nitrogen-doped carbon dots                                                  | 0-2.0 mmol/L                            | 10 $\mu$ mol/L         | 11        |
| Colorimetry and fluorescence             | Histidine-mediated synthesis of gold nanoclusters                           | 0.8-60 $\mu$ mol/L, 1.2-50 $\mu$ mol/L  | 118 nmol/L, 215 nmol/L | 12        |
| Colorimetry and ratiometric fluorescence | Catalase-like reaction of iodide ions and nitrogen-doped carbon dots        | 0.09-50 $\mu$ mol/L                     | 60 nmol/L              | 13        |
| Fluorescence                             | <i>Listeria monocytogenes</i> -derived nitrogen-doped carbon dots (NCDs-LM) | 0.5-10 $\mu$ mol/L, 10-1000 $\mu$ mol/L | 20 nmol/L              | This work |

**Table S2** The fluorescence lifetimes of NCDs-LM ( $\lambda_{\text{ex}} = 490 \text{ nm}$ ,  $\lambda_{\text{em}} = 550 \text{ nm}$ ) at different pH.

| pH    | $\tau_1$ (ns) | $\tau_2$ (ns) | $\tau_{\text{avg.}}$ (ns) |
|-------|---------------|---------------|---------------------------|
| 1.81  | 2.97(49%)     | 7.16(51%)     | 5.10                      |
| 2.21  | 3.44(47%)     | 7.10(53%)     | 5.37                      |
| 3.29  | 3.35(18%)     | 7.33(82%)     | 6.59                      |
| 4.10  | 3.41(16%)     | 7.63(84%)     | 6.93                      |
| 5.32  | 3.52(13%)     | 7.74(87%)     | 7.18                      |
| 6.37  | 3.93(18%)     | 7.95(82%)     | 7.24                      |
| 7.24  | 4.29 (27%)    | 8.58(73%)     | 7.43                      |
| 8.36  | 3.48(13%)     | 8.08(87%)     | 7.48                      |
| 9.15  | 4.81(31%)     | 8.70(69%)     | 7.51                      |
| 10.38 | 4.27(19%)     | 8.47(81%)     | 7.66                      |
| 11.20 | 4.73(25%)     | 8.69(75%)     | 7.68                      |

**Table S3** Comparison of the pH range with the reported methods of pH determination.

| Detection methods                          | Materials                                                                   | pH range   | Reference |
|--------------------------------------------|-----------------------------------------------------------------------------|------------|-----------|
| Fluorescence and colorimetry               | Microsystem-assisted synthesis of carbon dots                               | 3.5-10.2   | 14        |
| Fluorescence lifetime                      | CdTeSe/ZnS quantum dots (QDs)-NIR carbocyanine dye conjugates               | 2.0-8.0    | 15        |
| Fluorescence                               | <i>p</i> -aminothiophenol-coated CdSe/ZnS QDs                               | 3.2-6      | 16        |
| Luminescent dimetallic Eu(III)-based Probe | Dimetallic Eu(III)-containing complex                                       | 4-8        | 17        |
| Fluorescence lifetime imaging microscopy   | Mercaptopropionic acid-capped QDs                                           | 5.3-9.0    | 18        |
| pH-sensitive release system                | Basic cobalt carbonate nanovalves                                           | 2-7.4      | 19        |
| pH electrode                               | Tungsten needle modified with polyaniline film                              | 2-12       | 20        |
| Fluorescent chemosensors                   | Catechol Derivatives                                                        | 8-24       | 21        |
| Fluorescence                               | Polyamines bearing anthracene and benzophenone units at the respective ends | 1-13       | 22        |
| Micromechanical technique                  | Modified silicon and silicon nitride microcantilevers                       | 2-8        | 23        |
| Fluorescence                               | NCDs-LM                                                                     | 1.81-11.82 | This work |

## References

- 1 W. Shi, X. Li and H. Ma, *Angew. Chem. Int. Ed.*, 2012, **51**(26), 6432-6435.
- 2 S. Pedro, A. Salinas-Castillo, M. Ariza-Avidad, A. Lapresta-Fernández, C. Sánchez-González, C. Martínez-Cisneros, M. Puyol, L. Capitan-Vallvey and J. Alonso-Chamarro, *Nanoscale*, 2014, **6**(11), 6018-6024.
- 3 H. Liu, Y. Sun, Z. Li, R. Yang, Jie. Yang, A. Aryee, X. Zhang, J. Ge, L. Qu and Y. Lin, *Chin. Chem. Lett.*, 2019, **30**(9), 113-117.
- 4 M. Tatarczak-Michalewska, J. Flieger, J. Kawka, W. Flieger and E. Blicharska, *Molecules*, 2019, **24**(7), 1243-1256.
- 5 U. Kim and K. Kannan, *Anal. Chem.*, 2018, **90**(5) 3291-3298.
- 6 H. Cunha-Silva and M. Arcos-Martinez, *Talanta*, 2019, **199**, 262-269.
- 7 A. Macedo, K. Teo, A. Mente, M. Mcqueen, J. Zeidler, P. Poirier, S. Lear, A. Wielgosz and P. Britz-Mckibbin, *Anal. Chem.*, 2014, **86**(20) 10010-10015.
- 8 S. Han, B. Liu, Z. Fan, L. Zhang and F. Jiang, *Luminescence*, 2017, **32**(7), 1192-1196.
- 9 F. Du, F. Zeng, Y. Ming and S. Wu, *Microchim. Acta*, 2013, **180** (5), 453-460.
- 10 X. Tang, H. Yu, B. Bui, L. Wang, C. Xing, S. Wang, M. Chen, Z. Hu and W. Chen, *Bioact. Mater.*, 2021, **6**(6), 1541-1554.
- 11 H. Zhang, Y. Li, X. Liu, P. Liu, Y. Wang, T. An, H. Yang, D. Jing and H. Zhao, *Environ. Sci. Technol. Lett.*, 2014, **1**(1), 87-91.
- 12 Y. Wang, H. Zhu, X. Yang, Y. Dou and Z. Liu, *Analyst*, 2013, **138**(7) 2085-2089.
- 13 H. Wang, Q. Lu, Y. Liu, H. Li, Y. Zhang and S. Yao, *Sensor Actuat. B-Chem.*, 2017, **250**, 429-435.
- 14 S. Pedro, A. Salinas-Castillo, M. Ariza-Avidad, A. Lapresta-Fernández, C. Sánchez-González, C. Martínez-Cisneros, M. Puyol, L. Capitan-Vallvey and J. Alonso-Chamarro, *Nanoscale*, 2014, **6**(11), 6018-6024.
- 15 R. Tang, H. Lee and S. Achilefu, *J. Am. Chem. Soc.*, 2012, **134**(10), 4545-4548.
- 16 L. Dong, H. Xu, D. Li and Y. Wang. *Talanta*, 2017, **166**, 54-62.
- 17 J. Moore, R. Lord, G. Cisneros and M. Allen, *J. Am. Chem. Soc.*, 2012, **134** (42), 17372-17375.
- 18 A. Orte, J. Alvarez-Pez and M. Ruedas-Rama, 2013, *ACS Nano*, **7**(7), 6387-6395.



- 19 Z. Zheng, X. Huang and D. Shchukin, *Chem. Commun.*, 2014, **50**(90), 13936-13939.
- 20 C. Wang, G. Cai, J. Zhang and S. Du, *Appl. Mech. Mater.*, 2012, **105-107**, 1831-1834.
- 21 E. Evangelio, J. Hernando, I. Imaz, A. Ramón, B. Félix and R. Daniel, *Chem. Eur. J.*, 2008, **14**(31), 9754-9763.
- 22 G. Nishimura, Y. Shiraishi and T. Hirai, *Chem. Commun.*, 2005, **42**, 5313-5315.
- 23 H. Ji, K. Hansen, Z. Hu and T. Thundat, *Sensor Actuat. B-Chem.*, 2001, **72**, 3233-238.
